# Supplementary material for: Regulating a Zn/Co bimetallic catalyst in a metal–organic framework and oxyhydroxide for improved photoelectrochemical water oxidation
Source: Royal Society of Chemistry journal article supplement (doi:10.1039/d3dt01198d), 2023-01-01
Supplement: d3dt01198d1.pdf [file d3dt01198d1.pdf]

## Supporting Information

### **Regulating Zn/Co bimetallic catalyst in metal-organic framework and oxyhydroxide for improved photoelectrochemical water oxidation**

Xiu-Shuang Xing,<sup>a</sup> Xuyang Zeng,<sup>a,b</sup> Zhongyuan Zhou,<sup>c,d,\*</sup> Xin Song,<sup>c</sup> Xiaohua Jing,<sup>a</sup> Minghao Yuan,<sup>a</sup> Cuiying Xu,<sup>a</sup> Xiaofei Ren,<sup>a,b</sup> and Jimin Du<sup>a,\*</sup>

<sup>a</sup>Henan Key Laboratory of New Optoelectronic Functional Materials, College of Chemistry and Chemical Engineering, Anyang Normal University, Anyang 455000, P. R. China. E-mail: [djm@iccas.ac.cn](mailto:djm@iccas.ac.cn)

<sup>b</sup>College of Chemistry, Zhengzhou University, Zhengzhou 450000, P. R. China.

<sup>c</sup>School of Chemical and Environmental Engineering, Anyang Institute of Technology, Anyang 455000, P. R. China. Email: [20200038@ayit.edu.cn](mailto:20200038@ayit.edu.cn)

<sup>d</sup>Key Lab of Advanced Optical Manufacturing Technologies of Jiangsu Province, Soochow University, Suzhou 215006, China.

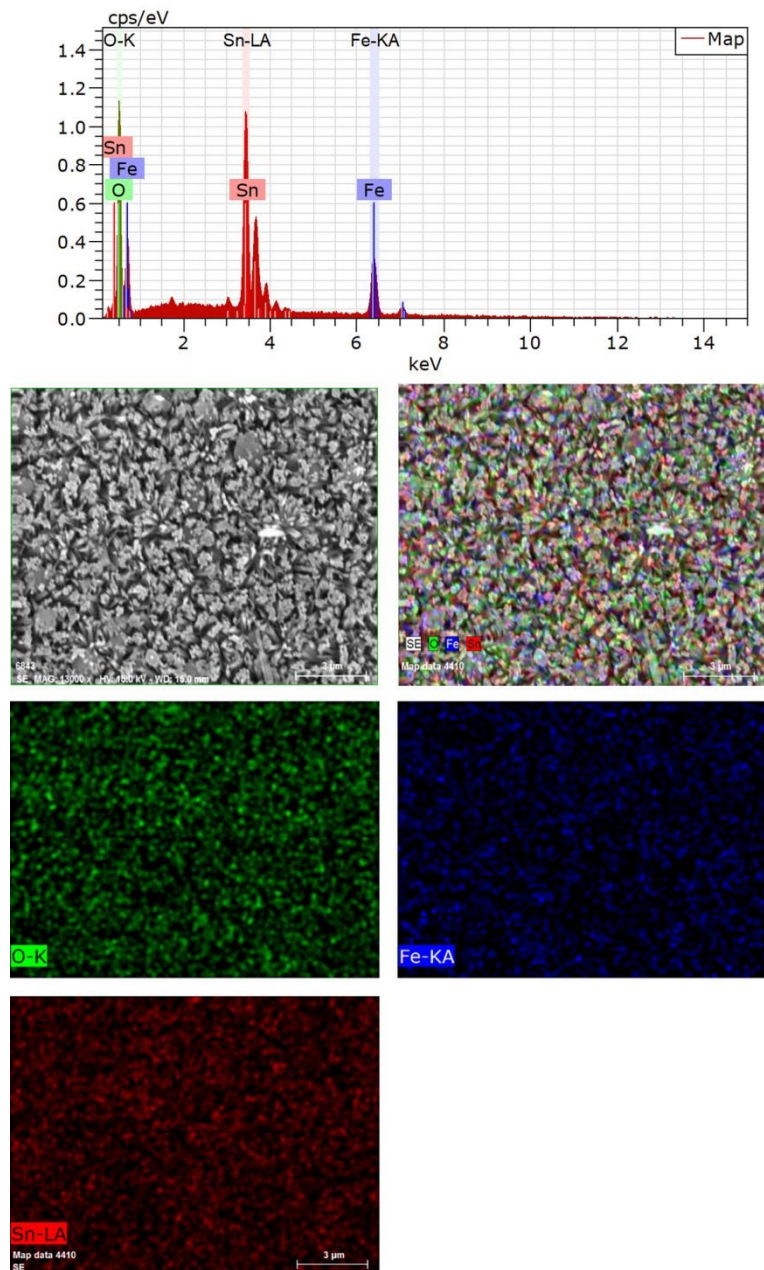

**Figure S1.** The EDS elements composition of FTO/Sn@ $\alpha$ -Fe<sub>2</sub>O<sub>3</sub> photoanode.

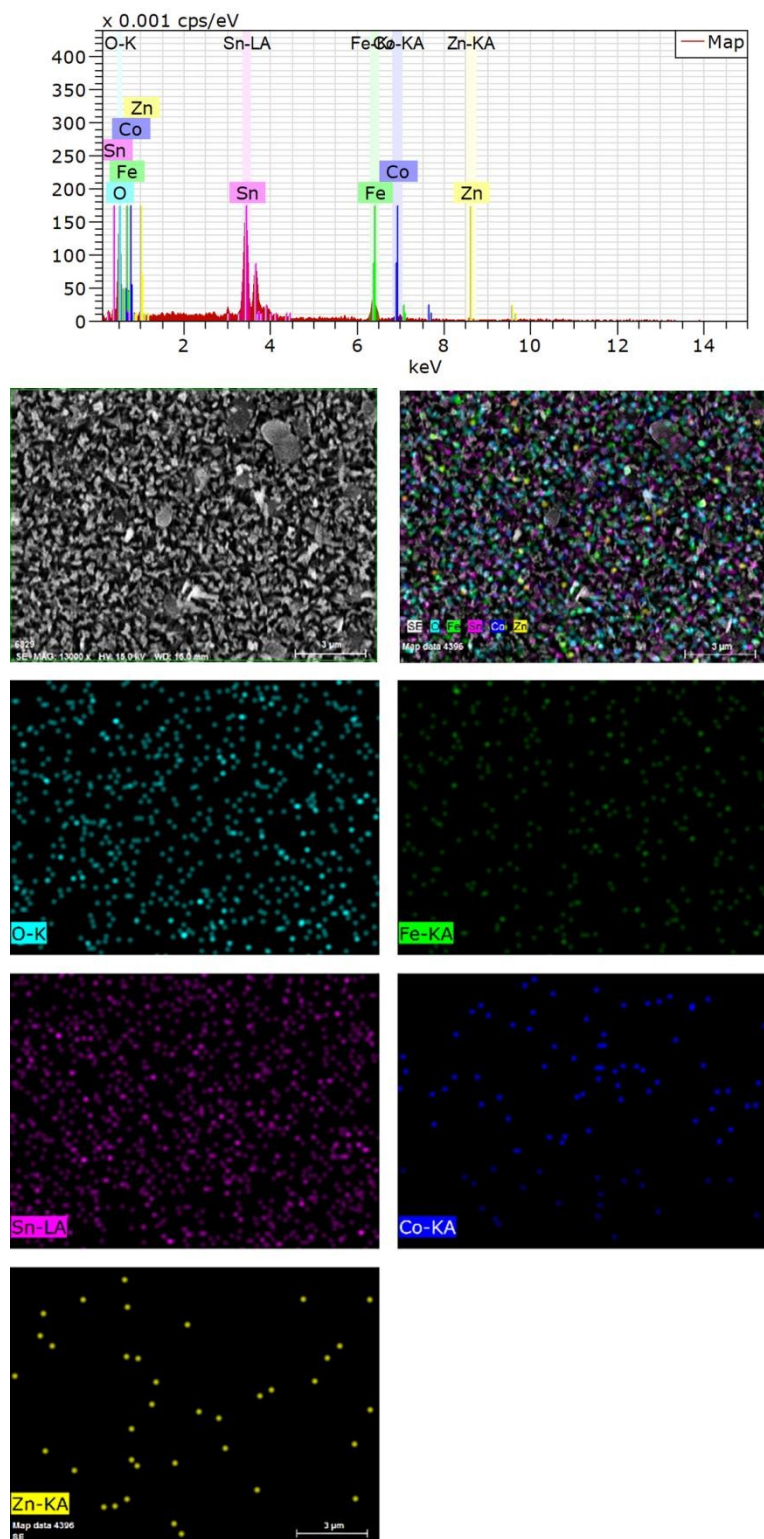

**Figure S2.** The EDS elements composition of FTO/Sn@ $\alpha$ -Fe<sub>2</sub>O<sub>3</sub>/Zn<sub>0.5</sub>Co<sub>0.5</sub>-ZIF photoanode.

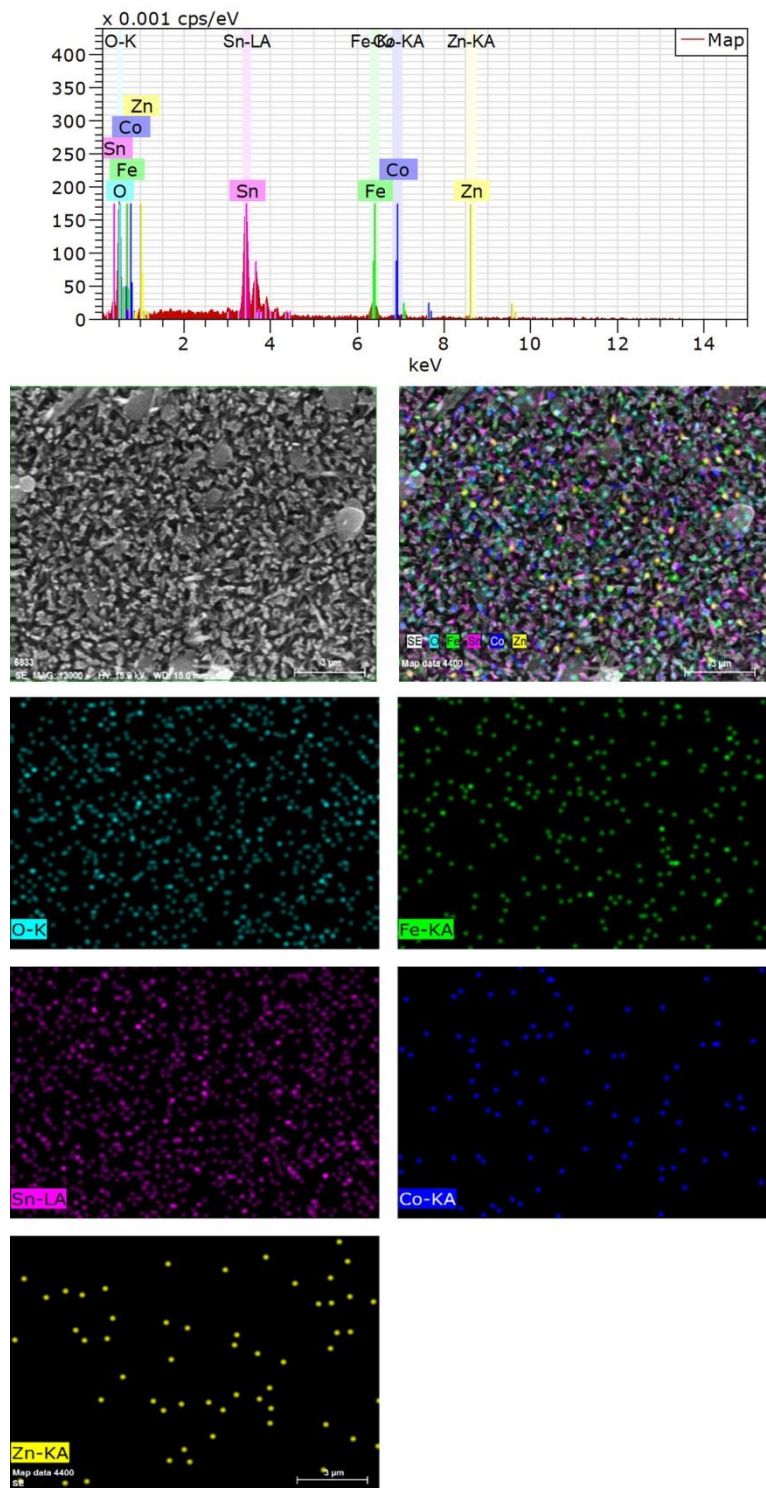

**Figure S3.** The EDS elements composition of FTO/Sn@ $\alpha$ -Fe<sub>2</sub>O<sub>3</sub>/Zn<sub>0.46</sub>Co<sub>0.54</sub>OOH photoanode.



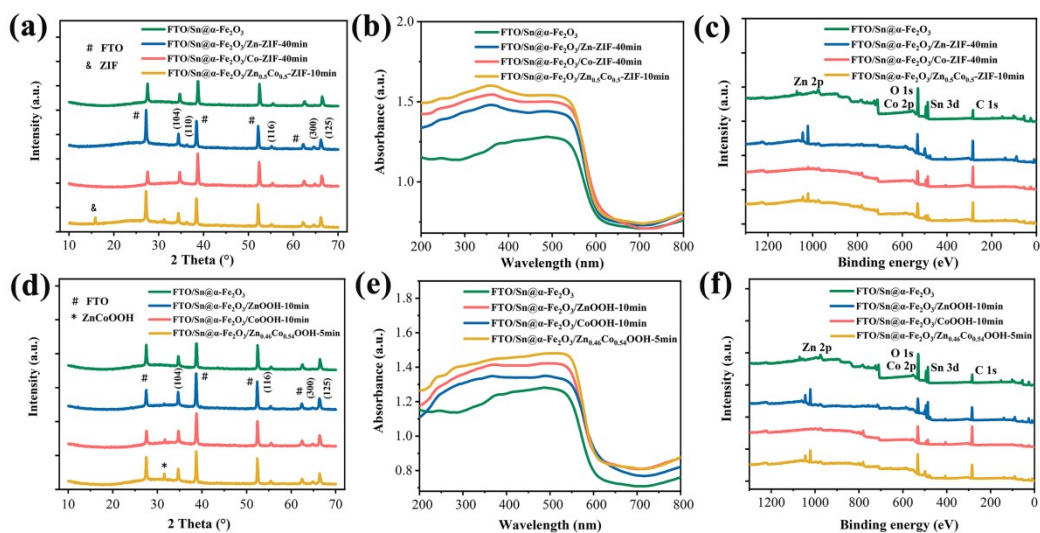

**Figure S4.** The (a and d) XRD patterns, (b and e) UV-vis reflectance spectra and (c and f) XPS survey spectra of  $\alpha$ -Fe<sub>2</sub>O<sub>3</sub> photoanodes decorated by ZnCo-ZIF and ZnCoOOH catalyst, respectively.

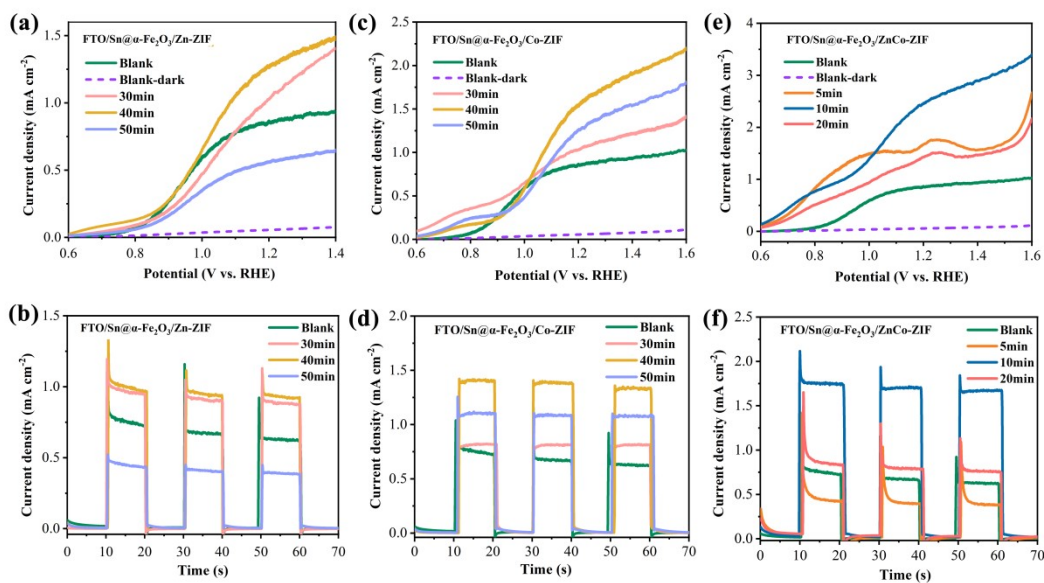

**Figure S5.** The *J-V* curves and transient photocurrent density curves of (a and b) FTO/Sn@ $\alpha$ -Fe<sub>2</sub>O<sub>3</sub>/Zn-ZIF, (c and d) FTO/Sn@ $\alpha$ -Fe<sub>2</sub>O<sub>3</sub>/Co-ZIF, (e and f) FTO/Sn@ $\alpha$ -Fe<sub>2</sub>O<sub>3</sub>/ZnCo-ZIF photoanodes for different optimization time.

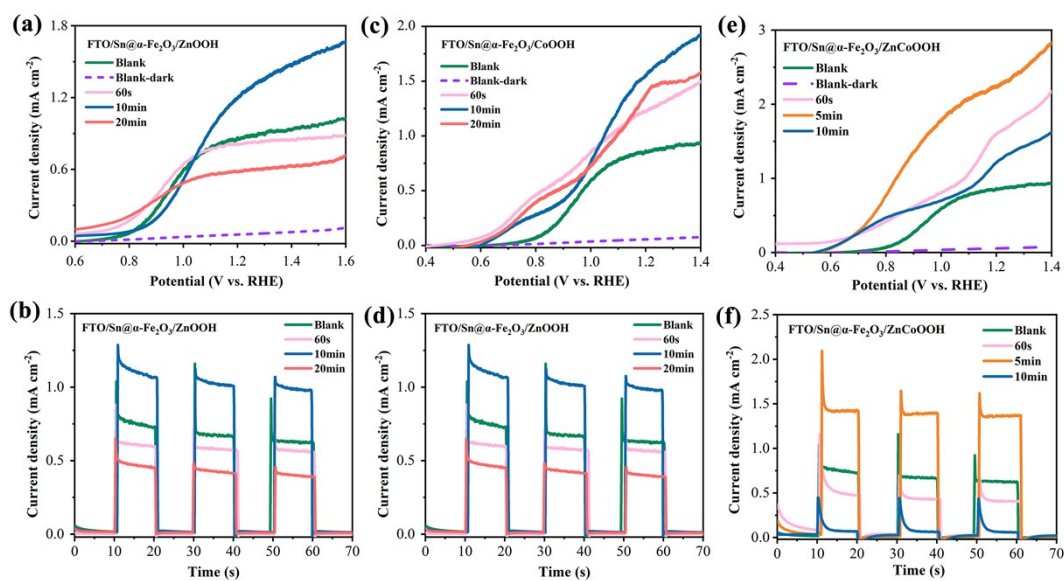

**Figure S6.** The  $J$ - $V$  curves and transient photocurrent density curves of (a and b) FTO/Sn@ $\alpha$ -Fe<sub>2</sub>O<sub>3</sub>/ZnOOH, (c and d) FTO/Sn@ $\alpha$ -Fe<sub>2</sub>O<sub>3</sub>/CoOOH, (e and f) FTO/Sn@ $\alpha$ -Fe<sub>2</sub>O<sub>3</sub>/ZnCoOOH photoanodes for different optimization time.

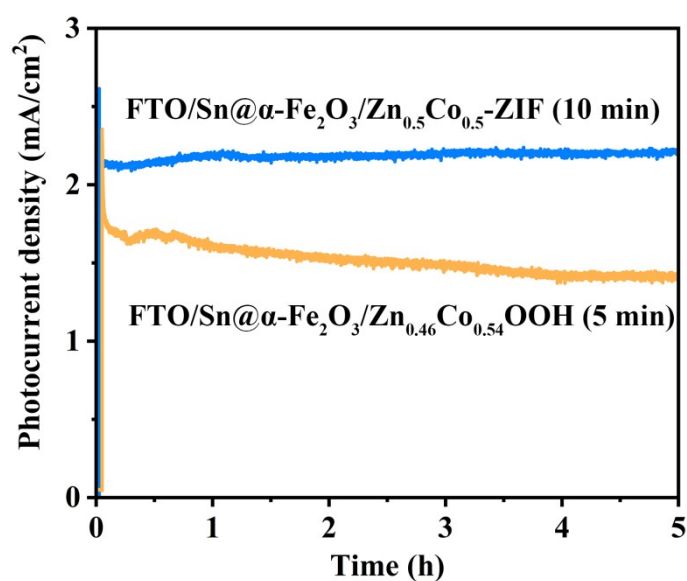

**Figure S7.**  $J$ - $t$  curves of the  $\alpha$ -Fe<sub>2</sub>O<sub>3</sub> photoanode with ZnCo-ZIF and ZnCoOOH catalyst at 1.23 V<sub>RHE</sub>.

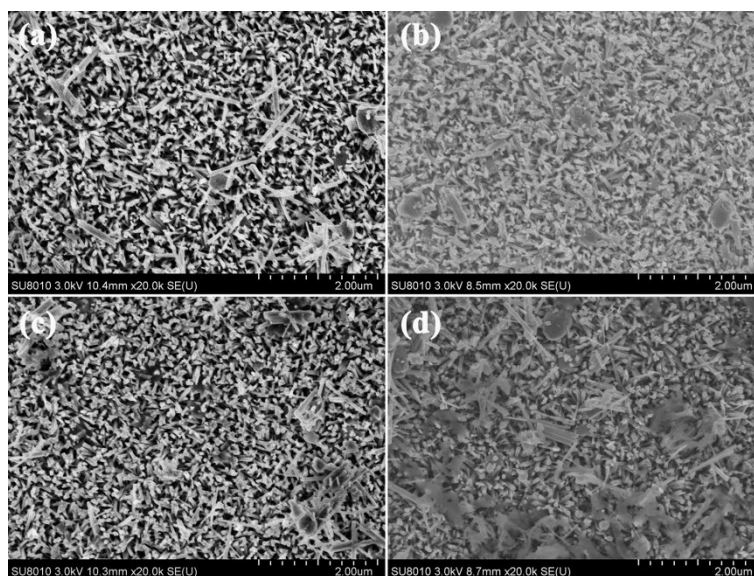

**Figure S8.** The SEM images before (a and c) and after (b and d) stability test of  $\alpha$ - $\text{Fe}_2\text{O}_3$  photoanode with ZnCo-ZIF and ZnCoOOH catalyst for 5 hours.

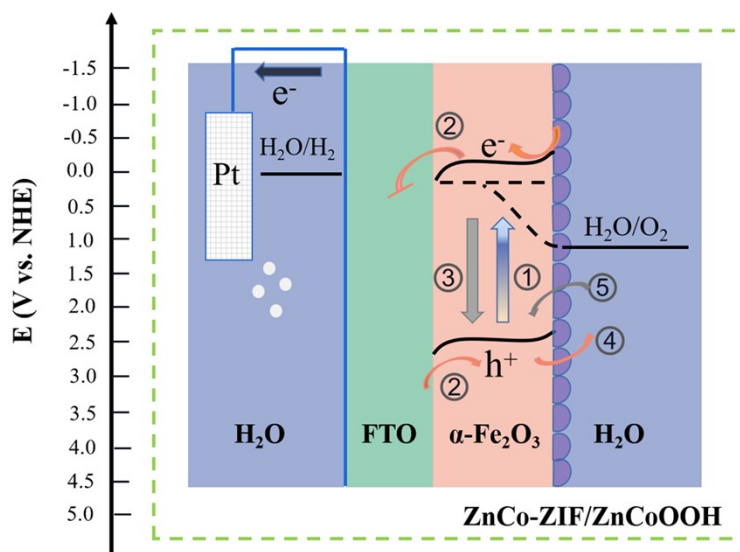

**Figure S9.** Schematic diagram of carriers transports in  $\alpha$ - $\text{Fe}_2\text{O}_3$  photoanode with ZnCo-ZIF or ZnCoOOH catalyst.

**Table S1.** The ion contents of Fe, Zn and Co in FTO/Sn@ $\alpha$ -Fe<sub>2</sub>O<sub>3</sub>/Zn<sub>0.5</sub>Co<sub>0.5</sub>-ZIF (10 min) and FTO/Sn@ $\alpha$ -Fe<sub>2</sub>O<sub>3</sub>/Zn<sub>0.46</sub>Co<sub>0.54</sub>OOH (5 min) photoanodes.

| Concentration             | FTO/Sn@ $\alpha$ -Fe <sub>2</sub> O <sub>3</sub> /Zn <sub>0.5</sub> Co <sub>0.5</sub> -ZIF<br>(10 min) | FTO/Sn@ $\alpha$ -Fe <sub>2</sub> O <sub>3</sub> /Zn <sub>0.46</sub> Co <sub>0.54</sub> OOH<br>(5 min) |
|---------------------------|--------------------------------------------------------------------------------------------------------|--------------------------------------------------------------------------------------------------------|
| Fe (mol/cm <sup>2</sup> ) | 2.97×10 <sup>-6</sup>                                                                                  | 1.90×10 <sup>-6</sup>                                                                                  |
| Zn (mol/cm <sup>2</sup> ) | 3.85×10 <sup>-7</sup>                                                                                  | 5.0×10 <sup>-7</sup>                                                                                   |
| Co (mol/cm <sup>2</sup> ) | 3.83×10 <sup>-7</sup>                                                                                  | 5.83×10 <sup>-7</sup>                                                                                  |

**Table S2.** The fitting EIS data of  $\alpha$ -Fe<sub>2</sub>O<sub>3</sub> photoanodes based on equivalent circuits.

|                                                | FTO/Sn@ $\alpha$ -Fe <sub>2</sub> O <sub>3</sub> | FTO/Sn@ $\alpha$ -Fe <sub>2</sub> O <sub>3</sub> /Zn <sub>0.5</sub> Co <sub>0.5</sub> -ZIF | FTO/Sn@ $\alpha$ -Fe <sub>2</sub> O <sub>3</sub> /Zn <sub>0.46</sub> Co <sub>0.54</sub> OOH |
|------------------------------------------------|--------------------------------------------------|--------------------------------------------------------------------------------------------|---------------------------------------------------------------------------------------------|
| $R_s$ ( $\Omega$ cm <sup>2</sup> )             | 9.18                                             | 11.55                                                                                      | 12.24                                                                                       |
| $R_{\text{trap}}$ ( $\Omega$ cm <sup>2</sup> ) | 6.1                                              | 9.1                                                                                        | 19.7                                                                                        |
| $C_{\text{bulk}}$ (F/cm <sup>2</sup> )         | 1.6×10 <sup>-6</sup>                             | 1.4×10 <sup>-6</sup>                                                                       | 1.6×10 <sup>-6</sup>                                                                        |
| $R_{\text{ct}}$ ( $\Omega$ cm <sup>2</sup> )   | 2019.0                                           | 433.2                                                                                      | 36.24                                                                                       |
| $C_{\text{ss}}$ (F/cm <sup>2</sup> )           | 3.6×10 <sup>-6</sup>                             | 1.7×10 <sup>-3</sup>                                                                       | 1.1×10 <sup>-3</sup>                                                                        |
